# Supplementary material for: Bicycle balance assist system reduces roll and steering motion for young and older bicyclists during real-life safety challenges
Source: PeerJ journal article supplement (doi:10.7717/peerj.16206), 2023-10-17
Supplement: Appendix_1.pdf [file Appendix_1.pdf]

1 **1 APPENDIX 1**

2 **1.1 Speed**

3 Since motion variability is expected between rides at 2 m/s and at 5 m/s with the same rider, we performed  
4 post-hoc ANOVA analysis to confirm the subjects followed the instruction and kept the speed constant. The  
5 analysis confirmed the constant speed assumption as we found that there were no significant differences  
6 in average ( $p > 0.05$ ), standard deviation ( $p > 0.05$ ), and range of speed (maximum-minimum speed,  
7  $p > 0.05$ ) between trials per subject.

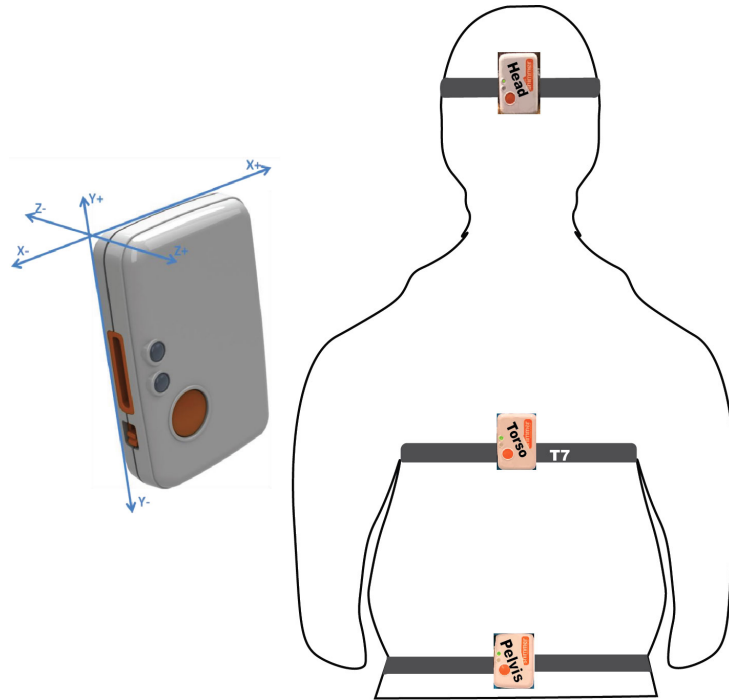

**Figure 1.** Shimmer3 IMU (3 axis) sensors placement on one young participant. The data from the torso was used in the analysis.

### Single-task, four conditions

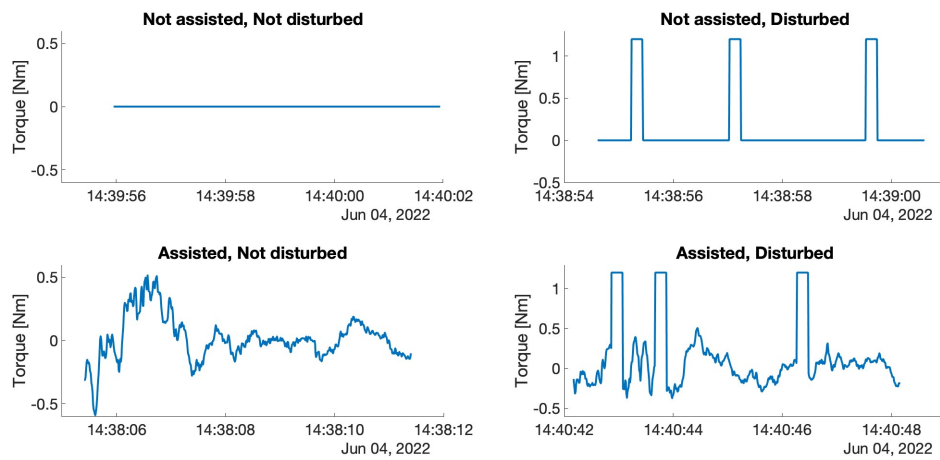

**Figure 2.** Demonstration of the implementation of four different conditions: Not Assisted Not Disturbed, Not Assisted Disturbed, Assisted Not Disturbed, Assisted Disturbed. Assisted implies the balance assist system was activated and the steer assistive torque was applied. Disturbed implies that the disturbances were applied.

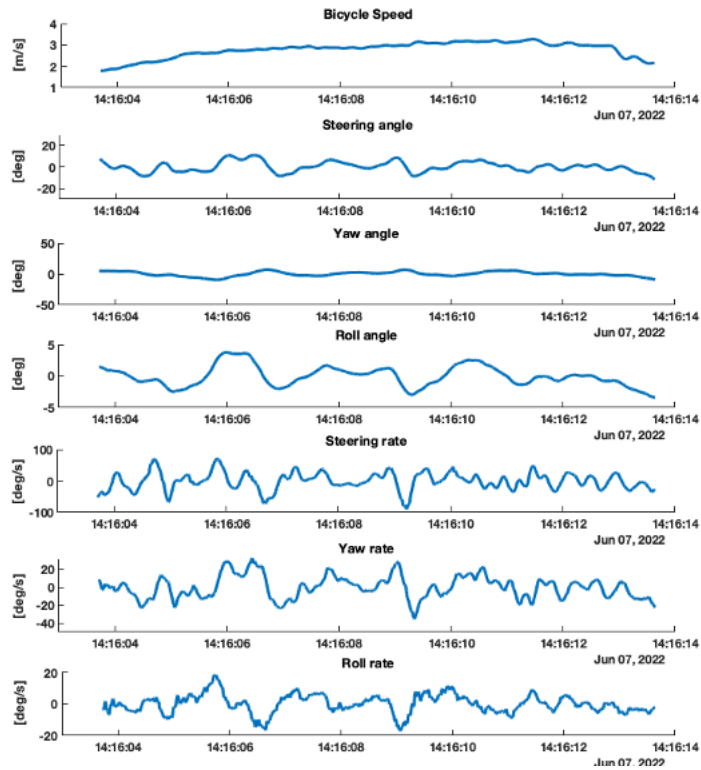

**Figure 3.** Segmented part of the time series starting at 1.5 m/s forward speed (after accelerating from the starting point). The figure depicts the cycling in a steady-state phase with an approximately constant speed until the rider either decelerates and reaches 1.5 m/s or begins to turn to return to the starting point, as indexed by a yaw rate  $> 4$  deg/s.

8 **1.2 Statistical analysis on the standard deviation of the outcome measures**

9 In this section, we present the analysis results for the standard deviation of the roll rate and the steer  
 10 rate in single- and multi-task cycling. The analysis was performed for all subjects, and we observed the  
 11 following consistent findings with the mean magnitude roll rate and steer rate:

## Single-task

### Standard deviation of Roll rate

#### Within Subjects Effects

| Cases                                   | Sum of Squares | df | Mean Square | F      | p      |
|-----------------------------------------|----------------|----|-------------|--------|--------|
| Balance assist                          | 13.473         | 1  | 13.473      | 44.375 | < .001 |
| Balance assist * agegroup               | 0.484          | 1  | 0.484       | 1.593  | 0.217  |
| Residuals                               | 9.108          | 30 | 0.304       |        |        |
| Disturbance                             | 6.673          | 1  | 6.673       | 12.877 | 0.001  |
| Disturbance * agegroup                  | 0.444          | 1  | 0.444       | 0.857  | 0.362  |
| Residuals                               | 15.546         | 30 | 0.518       |        |        |
| Balance assist * Disturbance            | 0.027          | 1  | 0.027       | 0.163  | 0.689  |
| Balance assist * Disturbance * agegroup | 0.083          | 1  | 0.083       | 0.490  | 0.489  |
| Residuals                               | 5.055          | 30 | 0.169       |        |        |

Note. Type III Sum of Squares

#### Between Subjects Effects

| Cases     | Sum of Squares | df | Mean Square | F     | p     |
|-----------|----------------|----|-------------|-------|-------|
| agegroup  | 23.385         | 1  | 23.385      | 6.550 | 0.016 |
| Residuals | 107.098        | 30 | 3.570       |       |       |

Note. Type III Sum of Squares

## Standard deviation of Steer rate

### Within Subjects Effects

| Cases                                   | Sum of Squares | df | Mean Square | F      | p      |
|-----------------------------------------|----------------|----|-------------|--------|--------|
| Balance assist                          | 113.093        | 1  | 113.093     | 30.081 | < .001 |
| Balance assist * agegroup               | 2.889          | 1  | 2.889       | 0.768  | 0.388  |
| Residuals                               | 112.789        | 30 | 3.760       |        |        |
| Disturbance                             | 558.555        | 1  | 558.555     | 34.150 | < .001 |
| Disturbance * agegroup                  | 20.122         | 1  | 20.122      | 1.230  | 0.276  |
| Residuals                               | 490.675        | 30 | 16.356      |        |        |
| Balance assist * Disturbance            | 8.190          | 1  | 8.190       | 1.786  | 0.191  |
| Balance assist * Disturbance * agegroup | 6.813          | 1  | 6.813       | 1.486  | 0.232  |
| Residuals                               | 137.550        | 30 | 4.585       |        |        |

Note. Type III Sum of Squares

### Between Subjects Effects

| Cases     | Sum of Squares | df | Mean Square | F     | p     |
|-----------|----------------|----|-------------|-------|-------|
| agegroup  | 271.987        | 1  | 271.987     | 2.294 | 0.140 |
| Residuals | 3557.037       | 30 | 118.568     |       |       |

Note. Type III Sum of Squares

## Multi-task

### Standard deviation of Roll rate

#### Within Subjects Effects

| Cases                                   | Sum of Squares | df | Mean Square | F      | p      |
|-----------------------------------------|----------------|----|-------------|--------|--------|
| Balance assist                          | 8.078          | 1  | 8.078       | 21.770 | < .001 |
| Balance assist * agegroup               | 0.041          | 1  | 0.041       | 0.111  | 0.742  |
| Residuals                               | 9.648          | 26 | 0.371       |        |        |
| Disturbance                             | 77.922         | 1  | 77.922      | 65.740 | < .001 |
| Disturbance * agegroup                  | 2.924          | 1  | 2.924       | 2.467  | 0.128  |
| Residuals                               | 30.818         | 26 | 1.185       |        |        |
| Balance assist * Disturbance            | 0.321          | 1  | 0.321       | 0.896  | 0.353  |
| Balance assist * Disturbance * agegroup | 1.051          | 1  | 1.051       | 2.934  | 0.099  |
| Residuals                               | 9.309          | 26 | 0.358       |        |        |

Note. Type III Sum of Squares

#### Between Subjects Effects

| Cases     | Sum of Squares | df | Mean Square | F     | p     |
|-----------|----------------|----|-------------|-------|-------|
| agegroup  | 7.336          | 1  | 7.336       | 2.046 | 0.165 |
| Residuals | 93.224         | 26 | 3.586       |       |       |

Note. Type III Sum of Squares

## Standard deviation of Steer rate

### Within Subjects Effects

| Cases                                   | Sum of Squares | df | Mean Square | F       | p      |
|-----------------------------------------|----------------|----|-------------|---------|--------|
| Balance assist                          | 64.786         | 1  | 64.786      | 9.760   | 0.004  |
| Balance assist * agegroup               | 2.736          | 1  | 2.736       | 0.412   | 0.527  |
| Residuals                               | 172.594        | 26 | 6.638       |         |        |
| Disturbance                             | 1948.894       | 1  | 1948.894    | 116.161 | < .001 |
| Disturbance * agegroup                  | 12.095         | 1  | 12.095      | 0.721   | 0.404  |
| Residuals                               | 436.217        | 26 | 16.778      |         |        |
| Balance assist * Disturbance            | 0.049          | 1  | 0.049       | 0.008   | 0.928  |
| Balance assist * Disturbance * agegroup | 9.944          | 1  | 9.944       | 1.693   | 0.205  |
| Residuals                               | 152.730        | 26 | 5.874       |         |        |

Note. Type III Sum of Squares

### Between Subjects Effects

| Cases     | Sum of Squares | df | Mean Square | F     | p     |
|-----------|----------------|----|-------------|-------|-------|
| agegroup  | 235.313        | 1  | 235.313     | 3.064 | 0.092 |
| Residuals | 1996.544       | 26 | 76.790      |       |       |

Note. Type III Sum of Squares
